# Supplementary material for: Dietary Supplementation with Soluble Plantain Non-Starch Polysaccharides Inhibits Intestinal Invasion of Salmonella Typhimurium in the Chicken
Source: PLOS journal article supplement (doi:10.1371/journal.pone.0087658), 2014-02-03
Supplement: S4 (10.1371/journal.pone.0087658.s004) [file journal.pone.0087658.s004]

**Dietary supplementation with soluble plantain non-starch polysaccharides inhibits intestinal invasion of Salmonella Typhimurium in the chicken.** Bryony N. Parsons, Paul Wigley, Hannah L. Simpson, Jonathan M. Williams, Suzie Humphrey, Anne-Marie Salisbury, Alastair J. M. Watson, Stephen C. Fry, David O'Brien, Carol L. Roberts, Niamh O'Kennedy, Åsa V. Keita, Johan D. Söderholm, Jonathan M. Rhodes and Barry J. Campbell.

**Supporting Information File S4:**

**Table S4: Water soluble non-starch polysaccharide preparation derived from plantain (*Musa AAB* (Horn)), in powder format, containing in addition up to 45% plantain-derived maltodextrin carrier, and nature-equivalent colours and flavours**

|                                                                       |                                                                                                   |
|-----------------------------------------------------------------------|---------------------------------------------------------------------------------------------------|
| <b>Source material</b>                                                | Plantain flour (Ecuador)                                                                          |
| <b>Added ingredients</b>                                              | Fungamyl® (Novozymes); Food grade starch-degrading enzyme ( $\alpha$ -amylase), fully deactivated |
| <b>Nutritional values</b>                                             |                                                                                                   |
| Total carbohydrate                                                    | 83.2 g/100g                                                                                       |
| <i>of which sugars</i><br><i>(maltodextrin, expressed as glucose)</i> | 40.4 g/100g                                                                                       |
| <i>of which starch</i>                                                | < 0.1 g/100g                                                                                      |
| <i>of which complex polysaccharides</i>                               | 40.9 g/100g                                                                                       |
| Dietary fibre (AOAC)                                                  | 1.9 g/100g                                                                                        |
| Protein                                                               | <0.1 g/100g                                                                                       |
| Fat                                                                   | < 0.1 g/100g                                                                                      |
| Ash                                                                   | 10.7 g/100g                                                                                       |
| Moisture                                                              | 5.4 g/100g                                                                                        |
| Energy                                                                | 1377 kJ/100g or 324 kcal/100g                                                                     |
| Calcium                                                               | 0.24 g/100g                                                                                       |
| Potassium                                                             | 0.98 g/100g                                                                                       |
| Magnesium                                                             | 0.11 g/100g                                                                                       |
| Sodium                                                                | 3.3 g/100g                                                                                        |
| <b>Physical properties</b>                                            |                                                                                                   |
| Texture                                                               | Fine particles, flour-like consistency                                                            |
| Solubility                                                            | Water soluble, alcohol insoluble                                                                  |
| Bulk density                                                          | 175 g/L                                                                                           |
| Particle size                                                         | 50 – 100 $\mu$ m                                                                                  |
