# Supplementary material for: Dietary Supplementation with Soluble Plantain Non-Starch Polysaccharides Inhibits Intestinal Invasion of Salmonella Typhimurium in the Chicken
Source: PLOS journal article supplement (doi:10.1371/journal.pone.0087658), 2014-02-03

**Dietary supplementation with soluble plantain non-starch polysaccharides inhibits intestinal invasion of *Salmonella Typhimurium* in the chicken.** Bryony N. Parsons, Paul Wigley, Hannah L. Simpson, Jonathan M. Williams, Suzie Humphrey, Anne-Marie Salisbury, Alastair J. M. Watson, Stephen C. Fry, David O'Brien, Carol L Roberts, Niamh O'Kennedy, Åsa V. Keita, Johan D. Söderholm, Jonathan M. Rhodes and Barry J. Campbell.

**Supporting Information File S5:**

**Figure S5: Desalting of Q-Sepharose anion-exchange chromatography fractions from soluble plantain NSP.** Following preparative anion-exchange chromatography, sodium chloride-eluted acidic polysaccharides (**A**) and unbound neutral polysaccharide (**B**) fractions were desalted into water using multiple PD MidiTrap™ G-10 gravity columns. Carbohydrate content of eluted fractions was measured by the phenol-sulphuric acid assay (blue line). Columns were pre-calibrated with the low molecular size marker phenol red (354 Da), measured as  $A_{560}$  (red line). Arrows indicate totally included ( $V_t$ ) column volume. The solid bar indicates the elution fractions collected for lyophilisation and bioassay.

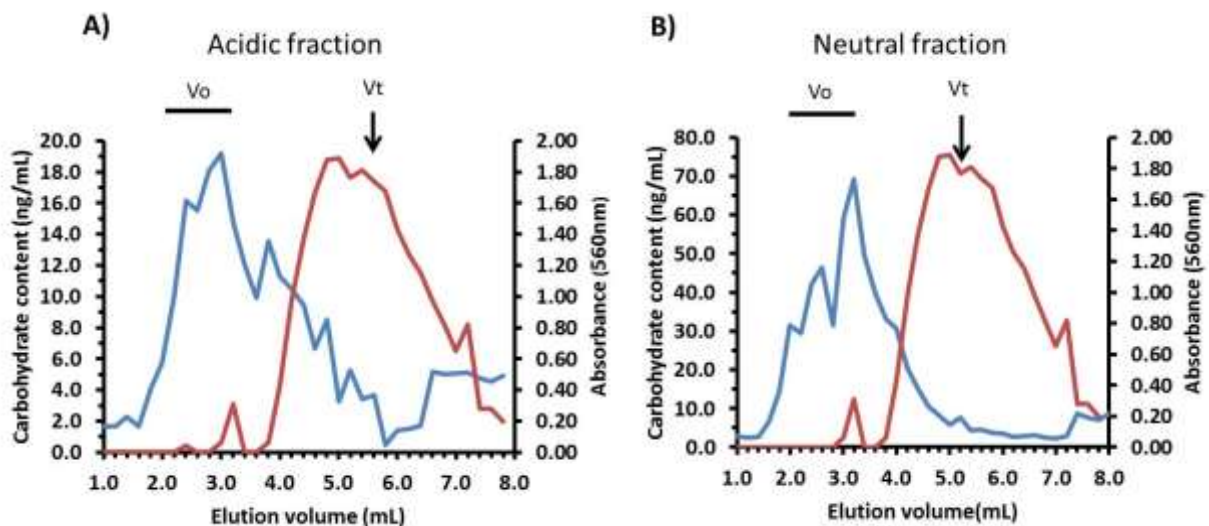

Supplement: S5 (10.1371/journal.pone.0087658.s005) [file journal.pone.0087658.s005]
